# Supplementary material for: Heart Uptake of [18F]Fluoro-4-Thia-Oleate in a Non-Alcoholic Fatty Liver Disease Mouse Model
Source: MDPI journal article supplement (doi:10.3390/ph15121577), 2022-12-17
Supplement: s1 [file s1]

# Heart Uptake of [ $^{18}\text{F}$ ]Fluoro-4-Thia-Oleate in a Non-Alcoholic Fatty Liver Disease

## Mouse Model

Junfeng Li, Weidong Hu, Jiangling Peng, Patty Wong, Fouad Kandeel, Tove Olafsen and

John E. Shively

### Supplementary data.

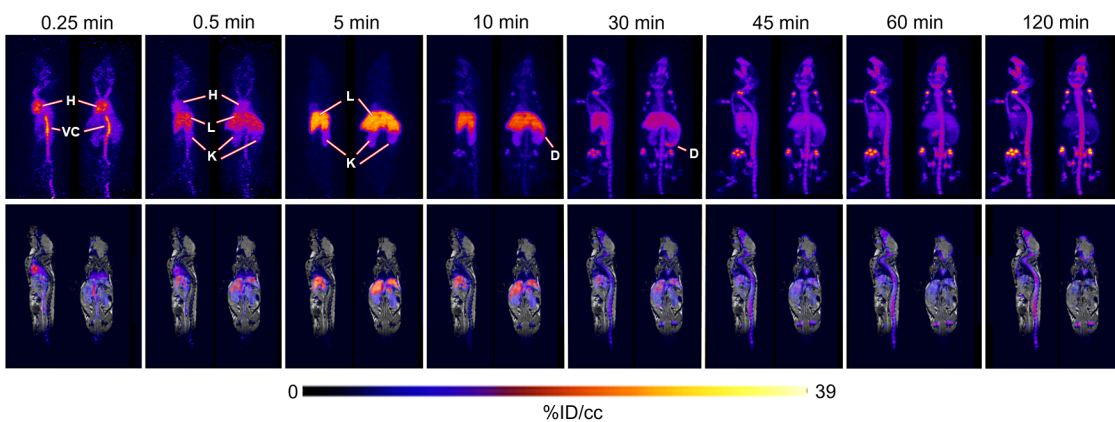

**Supplementary Figure S1. PET and MR images of a representative male WT mouse subjected to 2 hr dynamic scans with [ $^{18}\text{F}$ ]FTO.** Mice (males, N = 2, 44 week old) were fasted for 6 hours prior to tail vein injection of 3.54 MBq of [ $^{18}\text{F}$ ]FTO. **Top panel:** Sagittal and coronal MIP PET images. **Bottom panel:** Sagittal and coronal MPR PET/MR overlay images. Selected time points along with organs (H= heart, VC= vena cava, K= kidney(s), D=duodenum) are shown. Images are representative of two mice scanned.

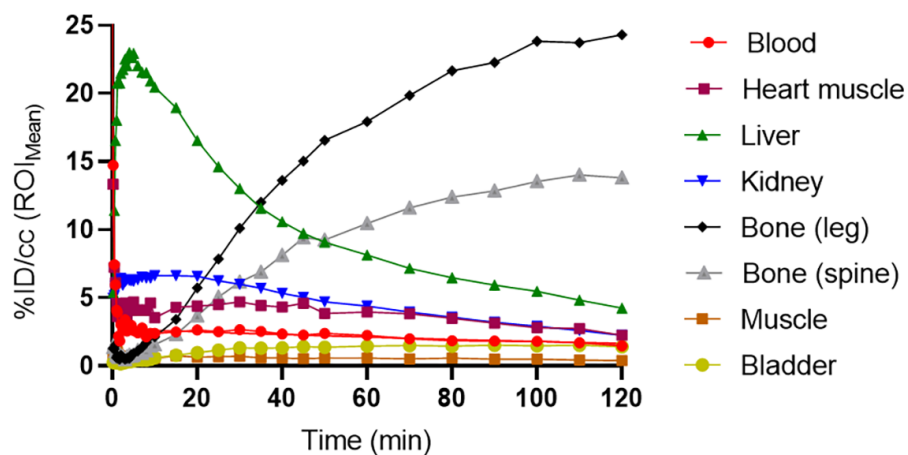

**Supplementary Figure S2. Time-activity curves of a representative male WT mouse subjected to 2 hr dynamic scan with [ $^{18}\text{F}$ ]FTO.** The curves were generated from the 120-minute dynamic PET scan of the male WT mouse in Figure 1 injected with 3.54 MBq of [ $^{18}\text{F}$ ]FTO.

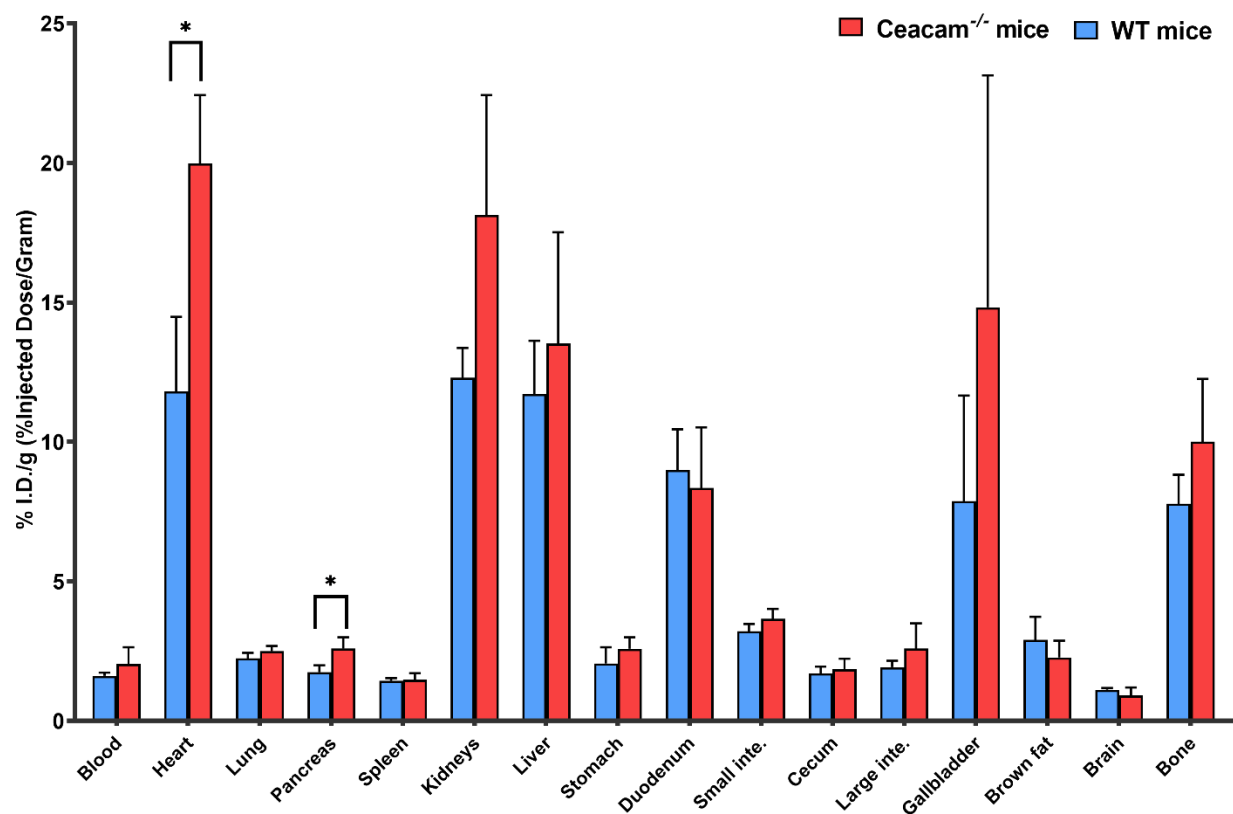

**Supplementary Figure S3. Comparative biodistributions of [<sup>18</sup>F]FTO in WT vs *Ceacam*<sup>-/-</sup> mice.** Tissue biodistributions performed at 40 minutes following injection of 2.72~6.70 MBq (73.5~189  $\mu$ Ci) of [<sup>18</sup>F]FTO into weight matched (15-18 week old) male WT (blue) or *Ceacam*<sup>-/-</sup> mice (red) (N = 5). \*  $P < 0.01$ .
